# Supplementary figures and images for: Ferroptosis-Related Gene Model to Predict Overall Survival of Ovarian Carcinoma
Source: Hindawi journal article supplement (doi:10.1155/2021/6687391), 2021-01-13

**A**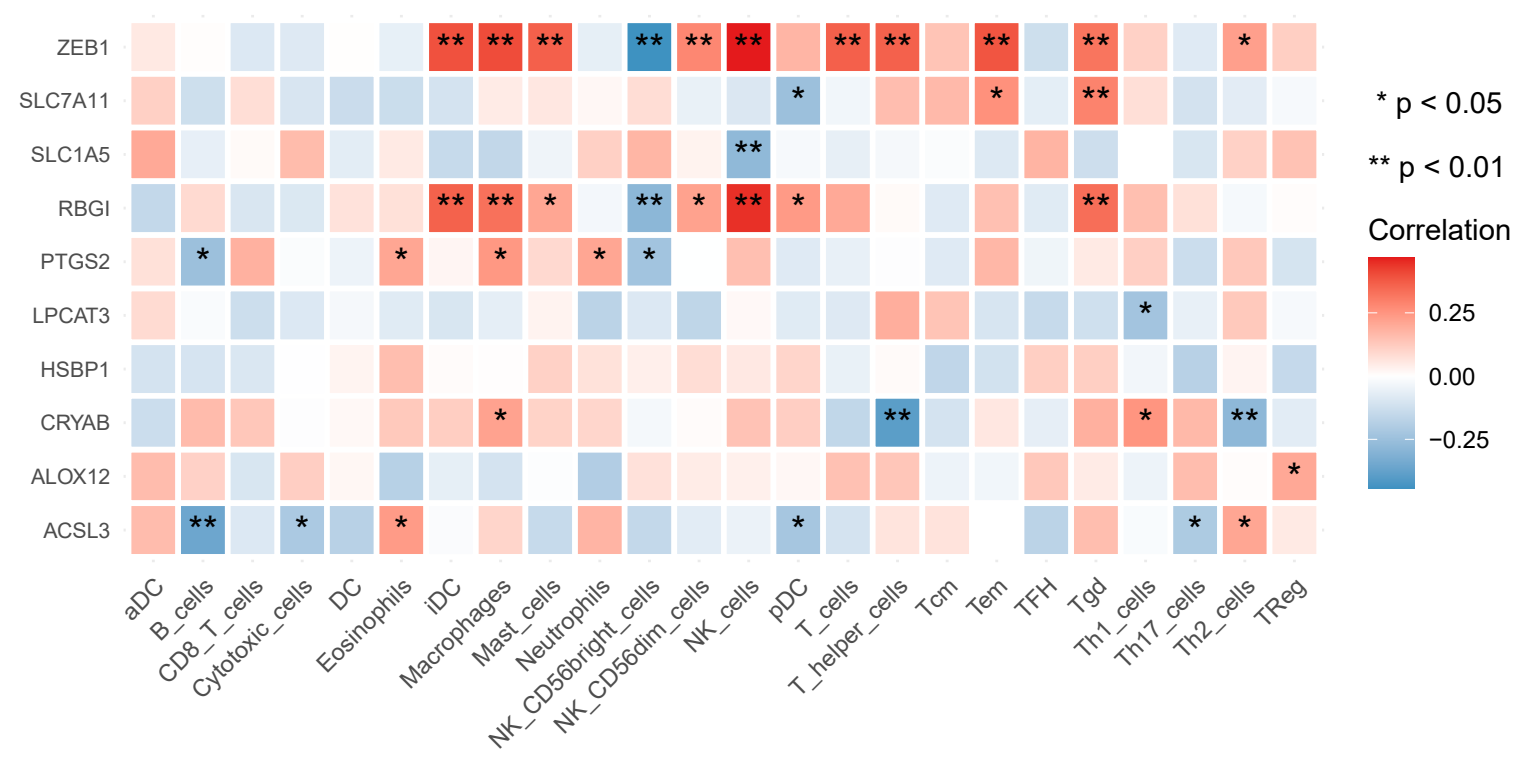**B**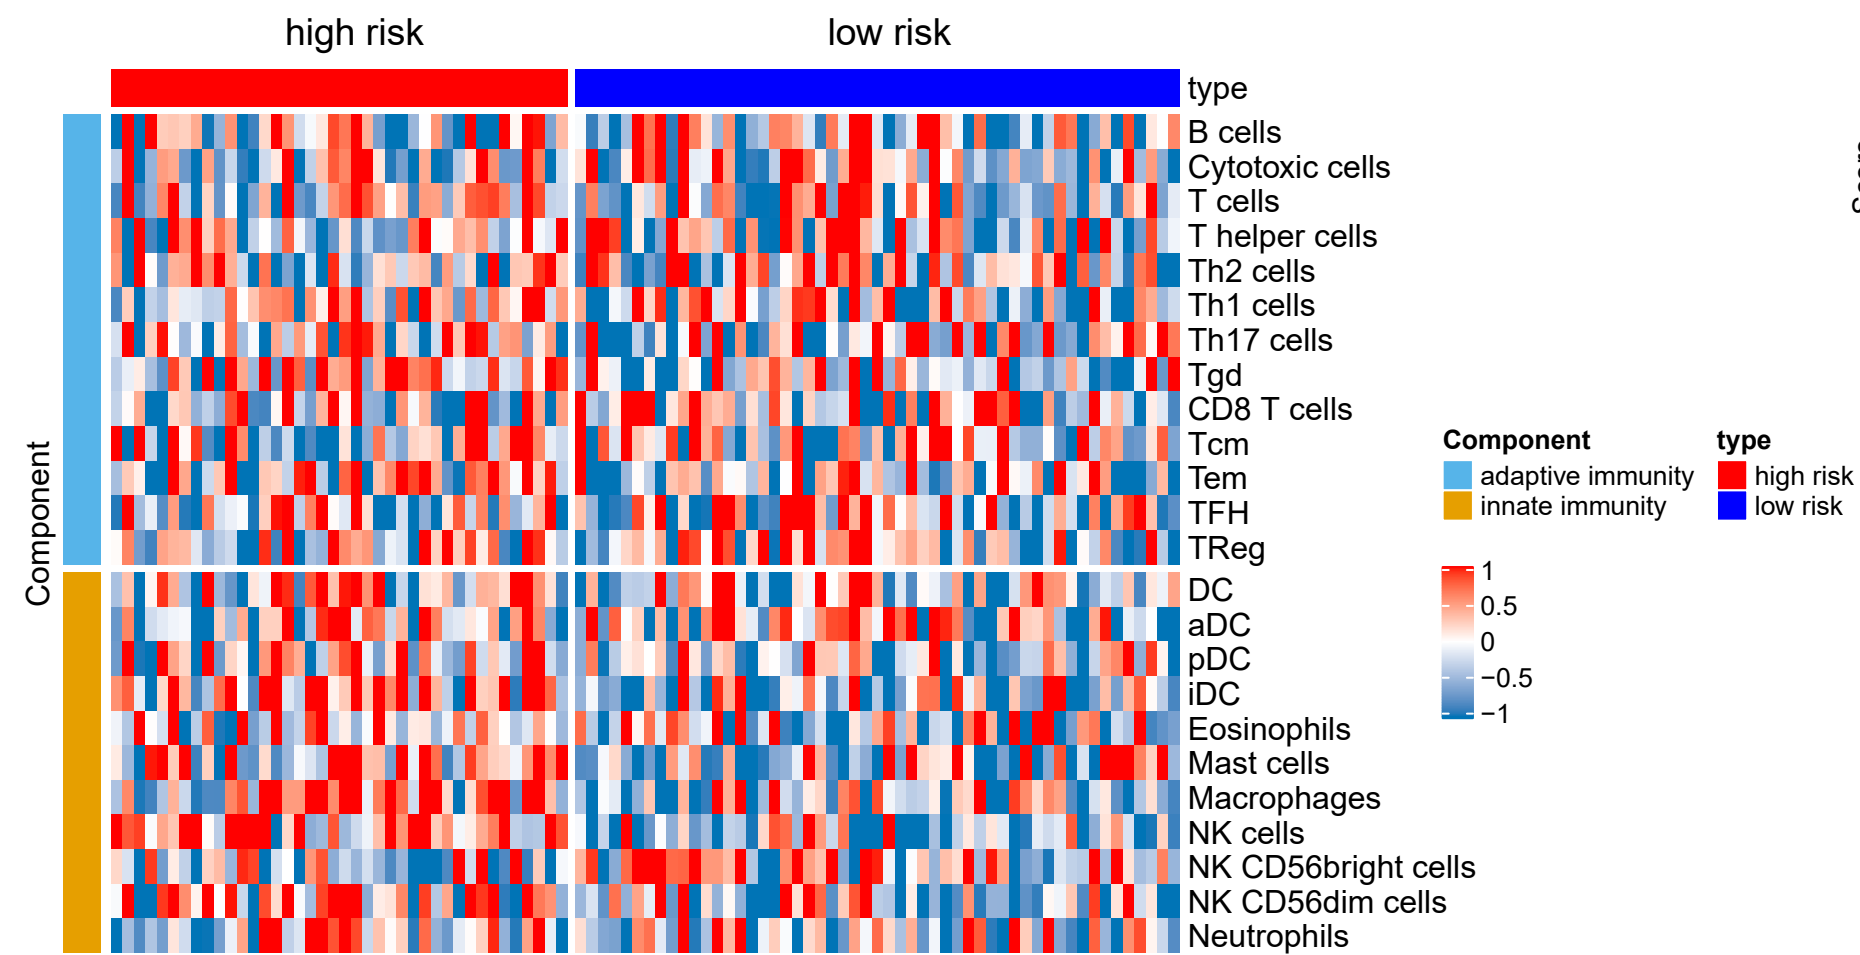**C**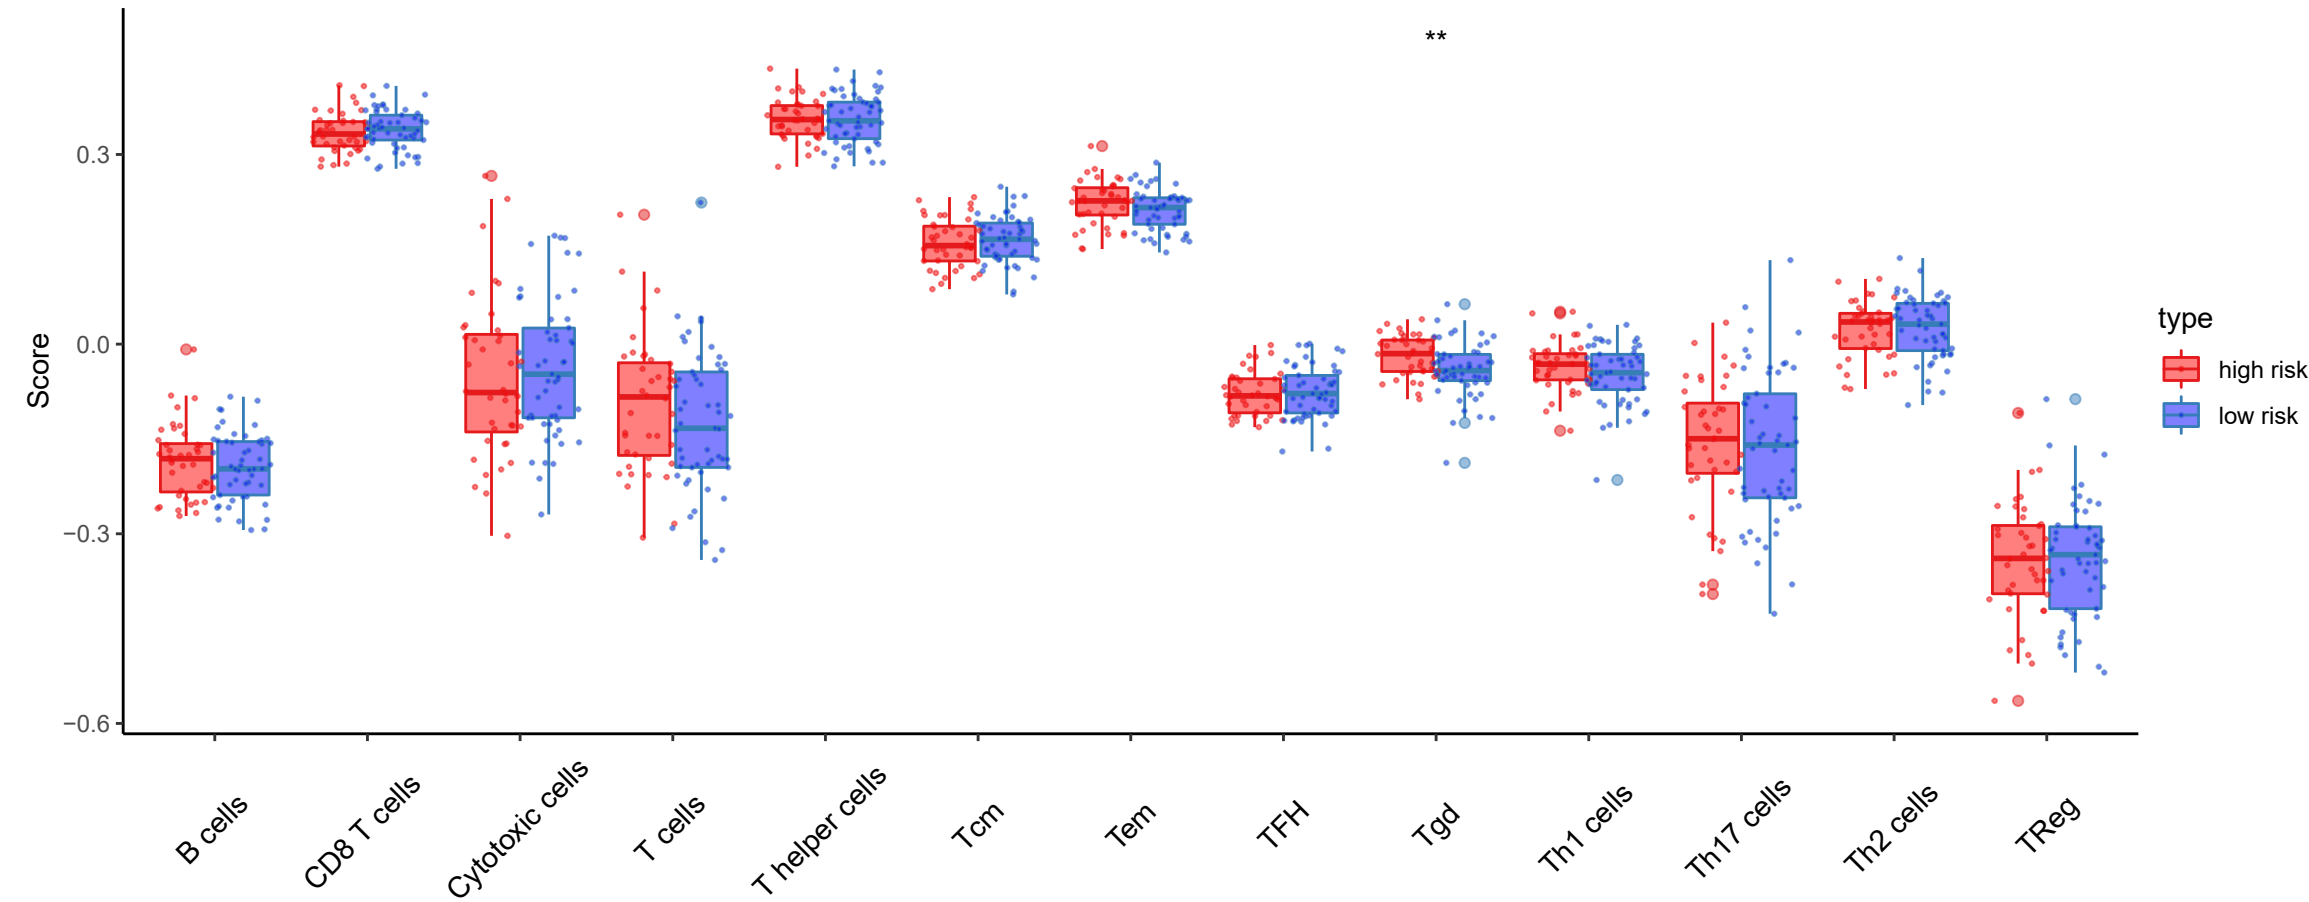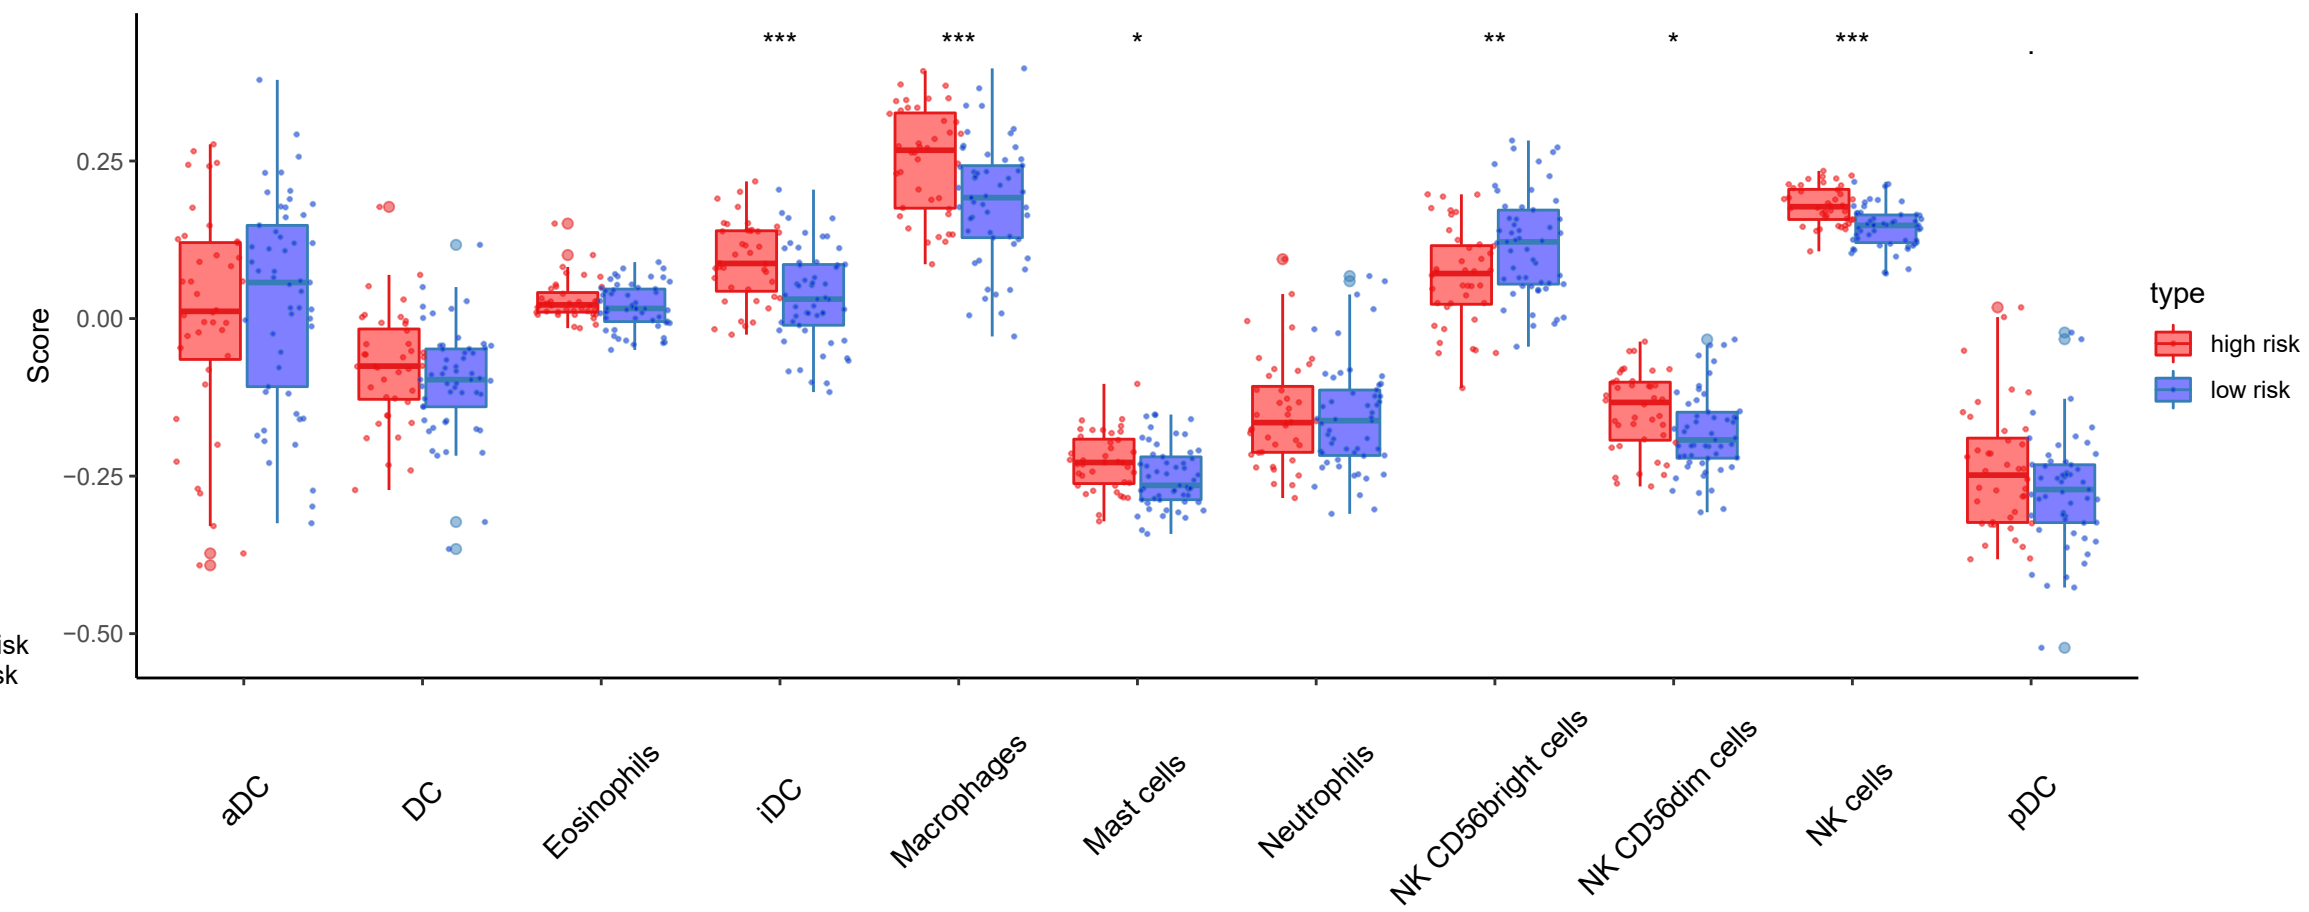**D**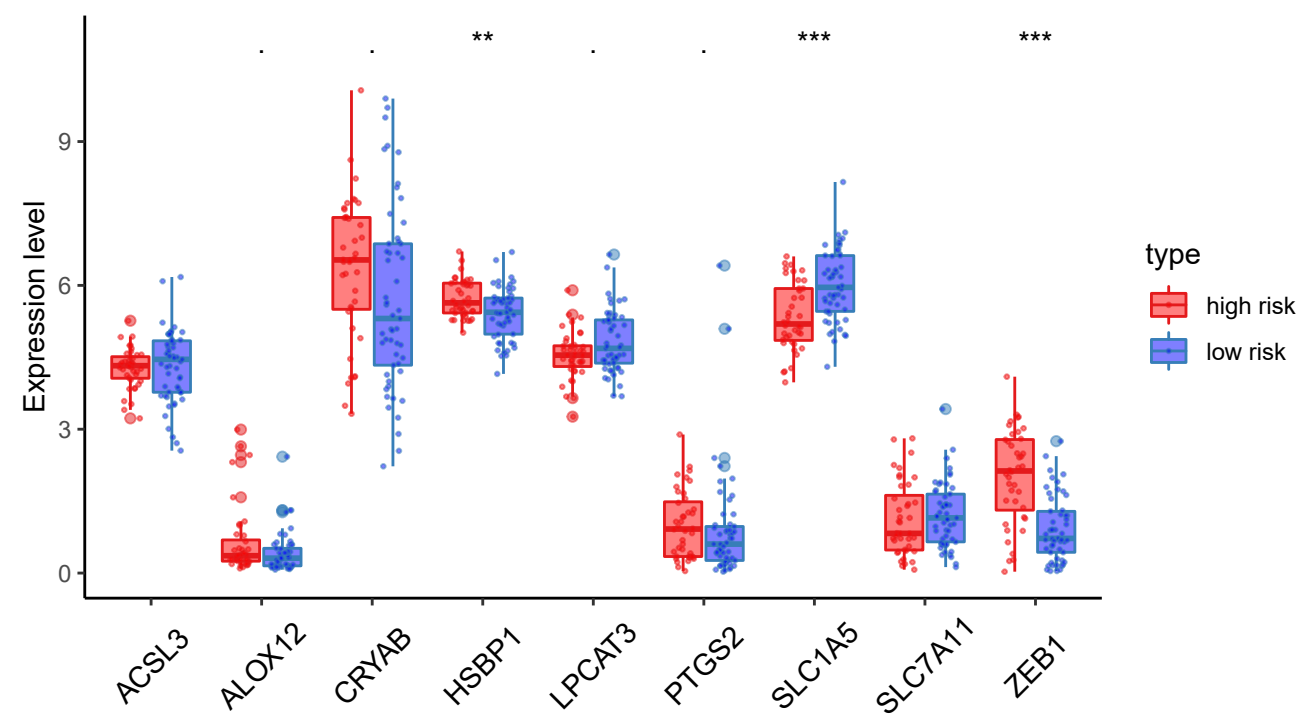

Supplement: f1 [file 6687391.f1.zip]

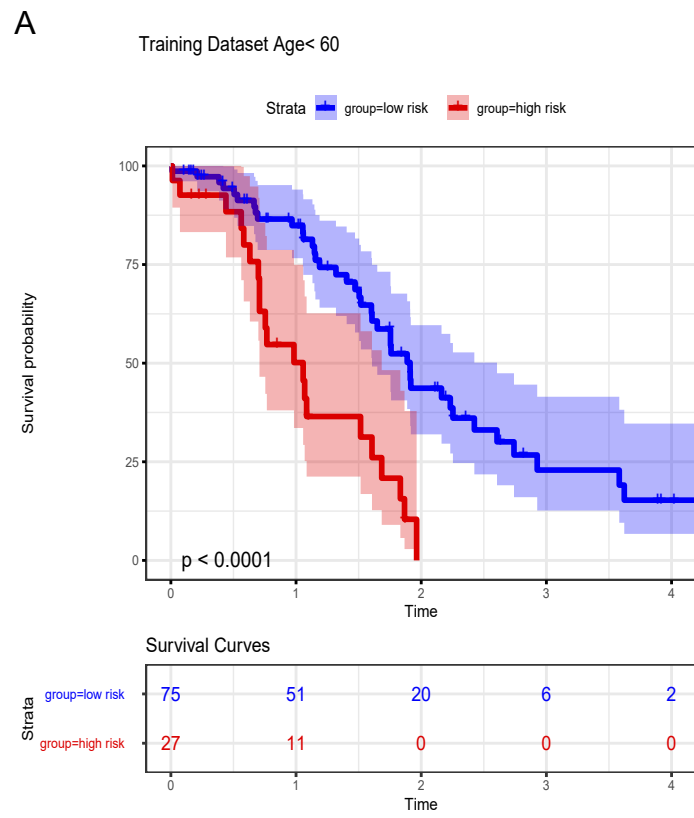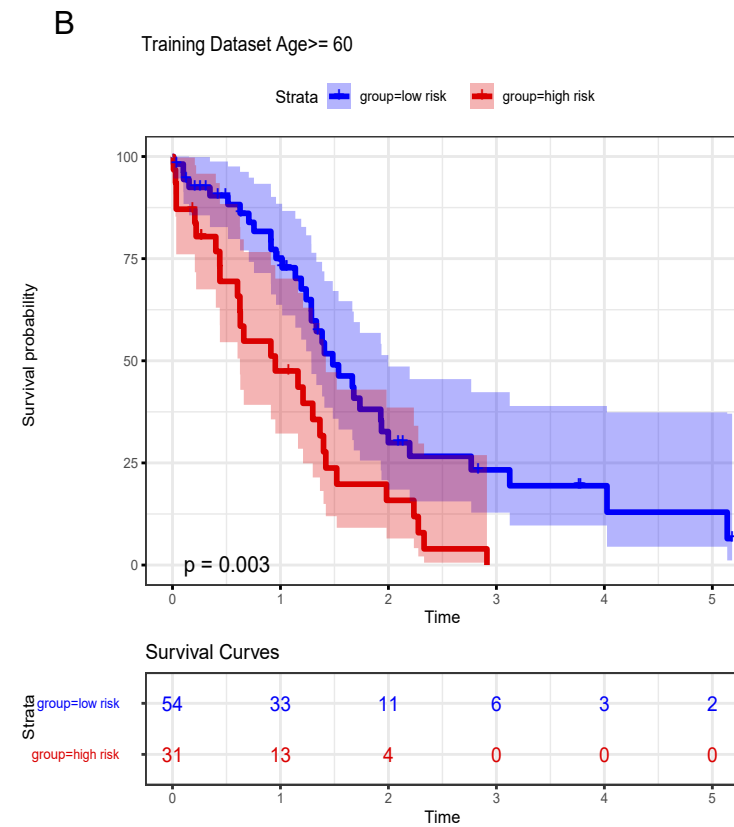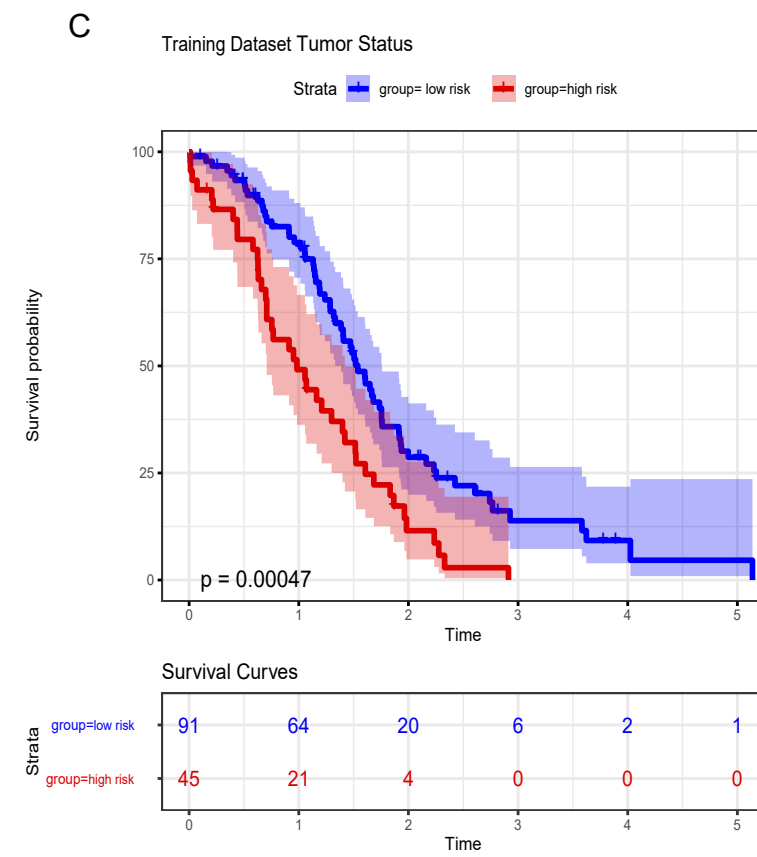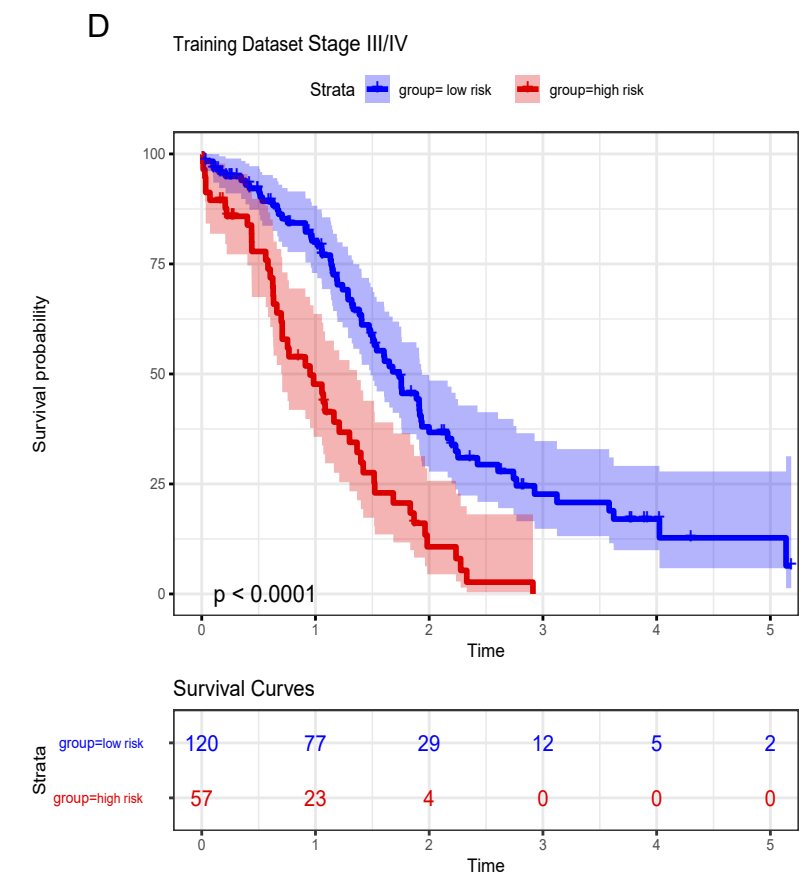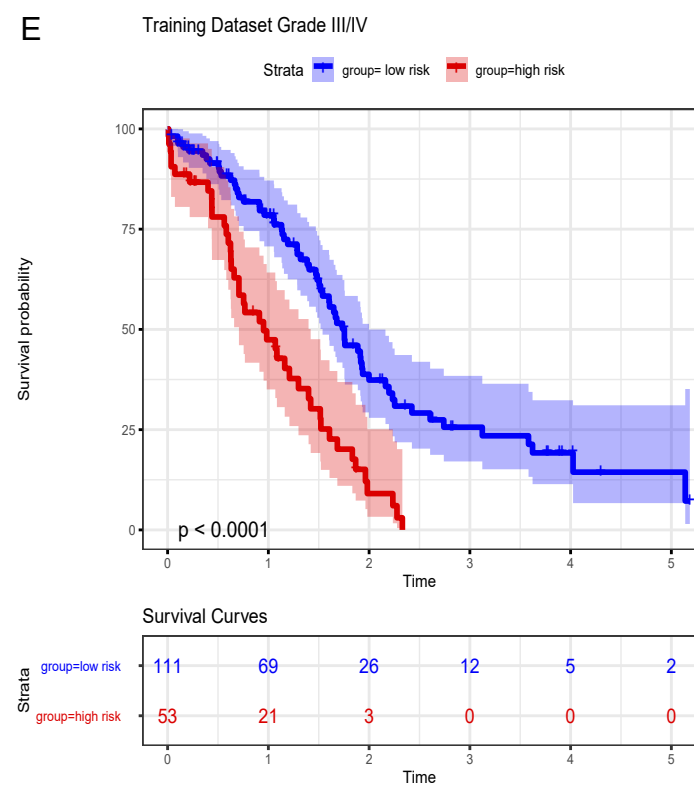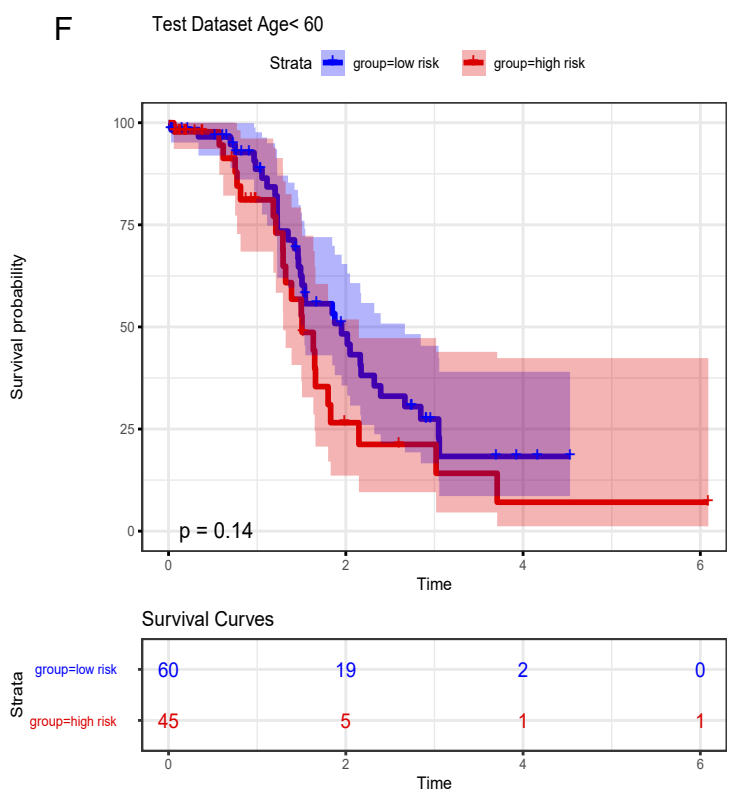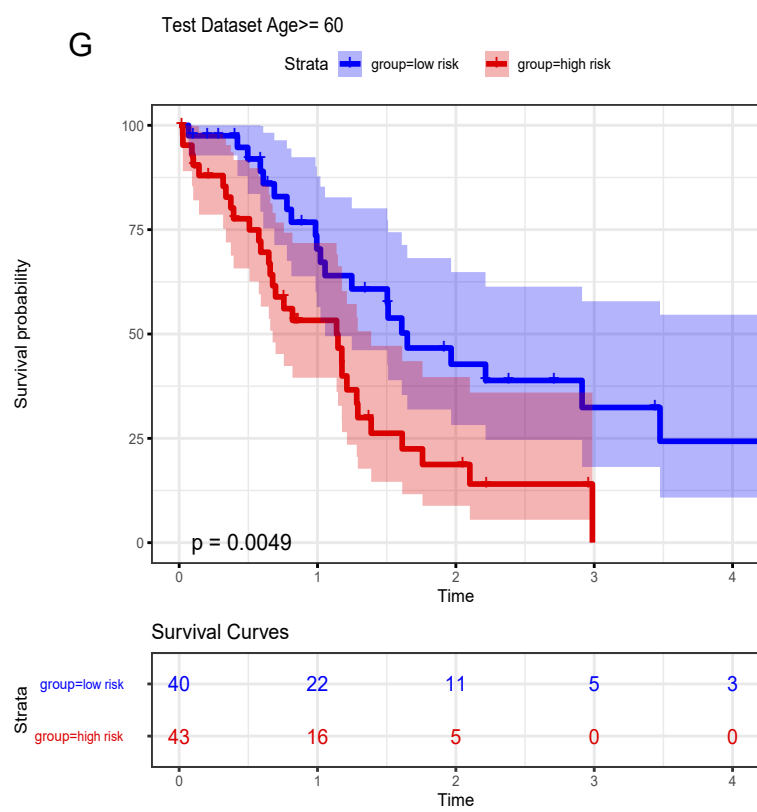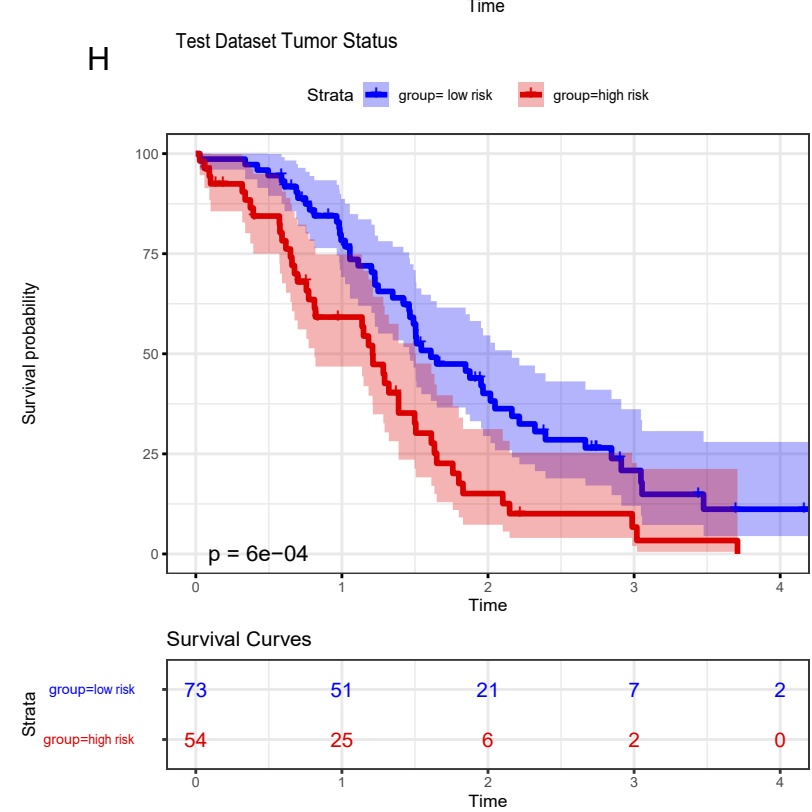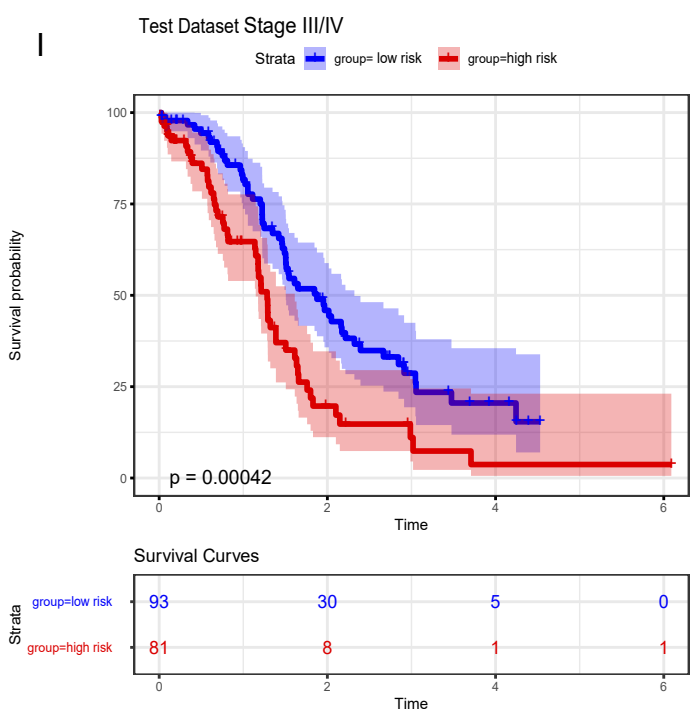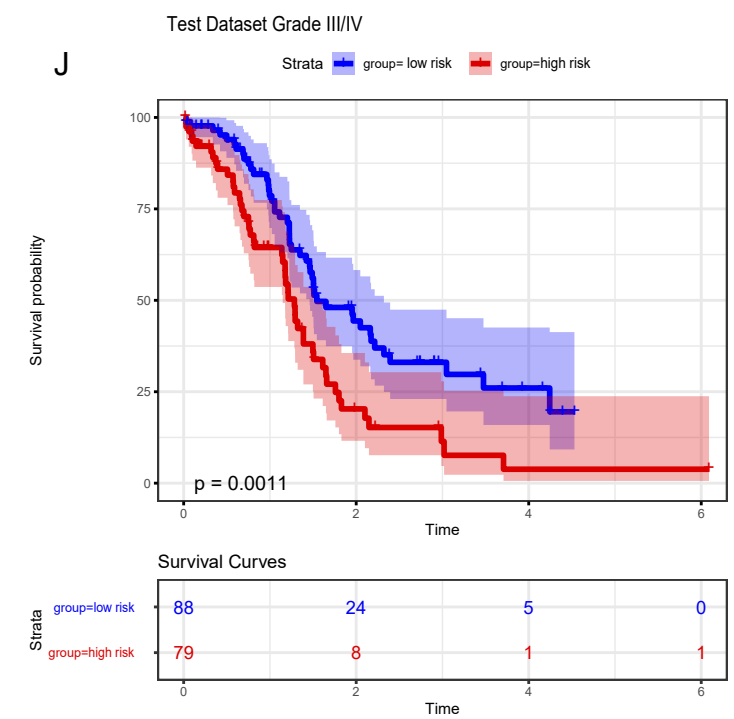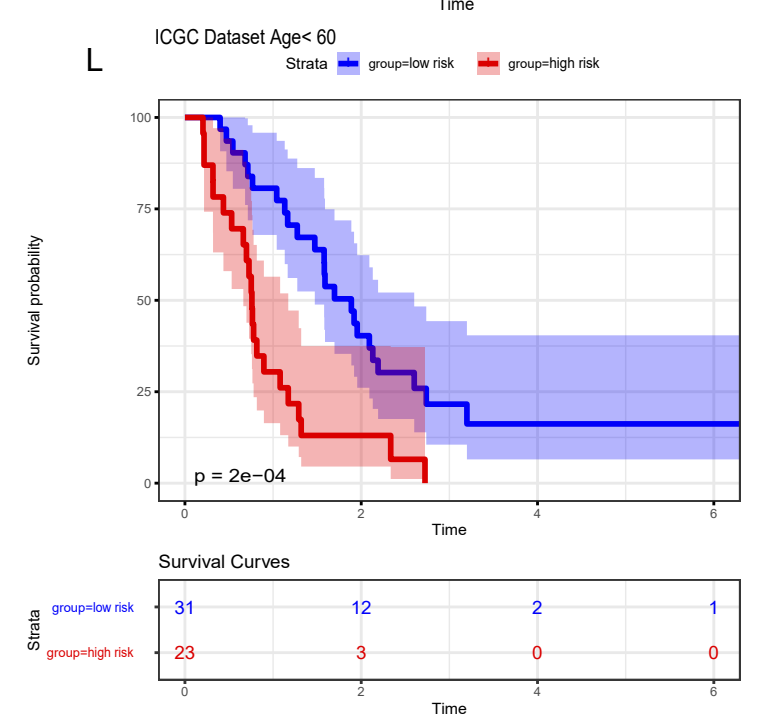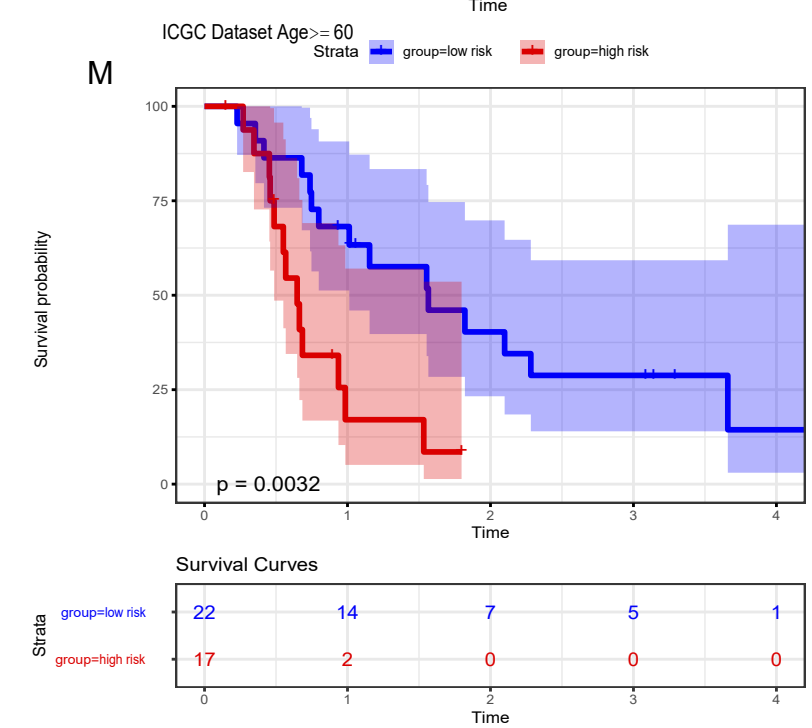

Supplement: f1 [file 6687391.f1.zip]

**A**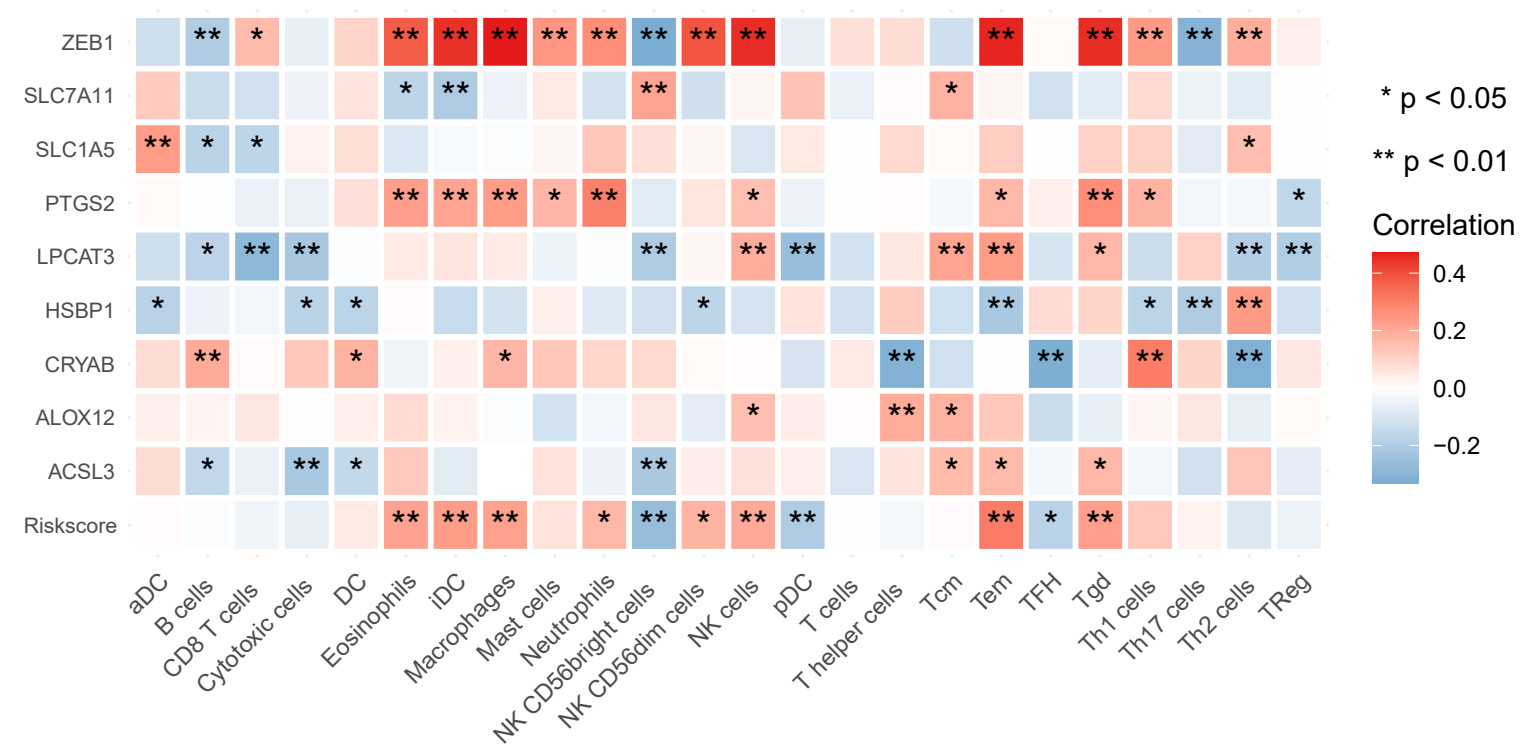**B**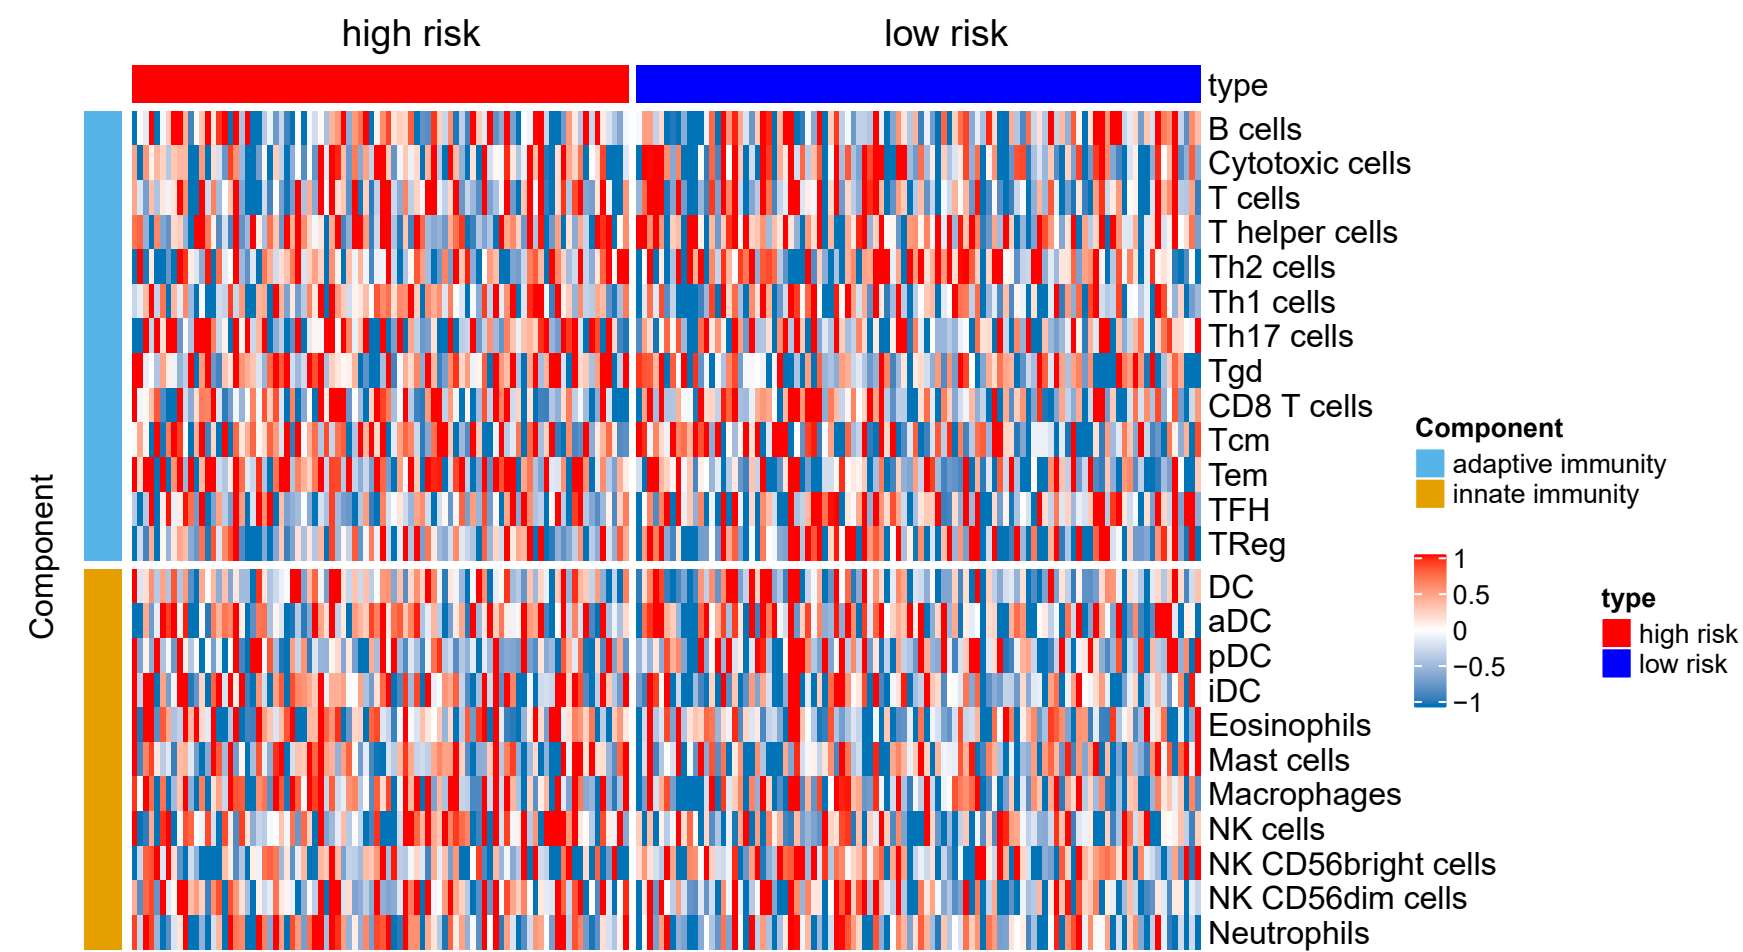**D**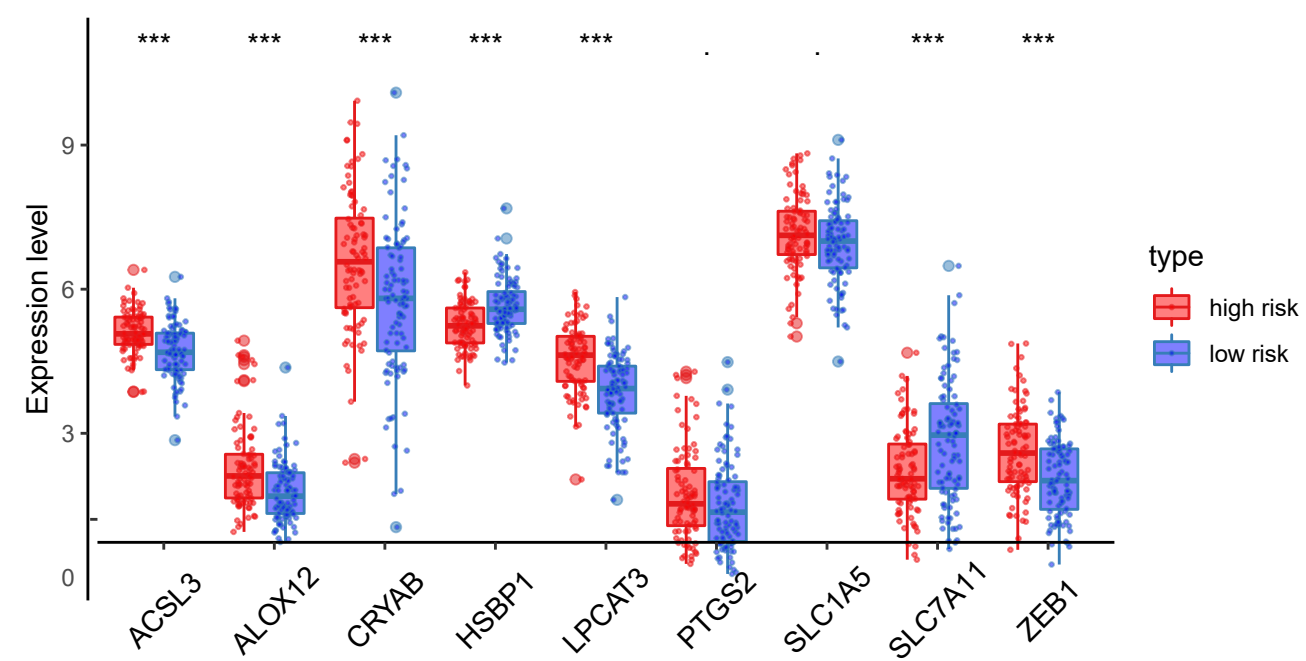**C**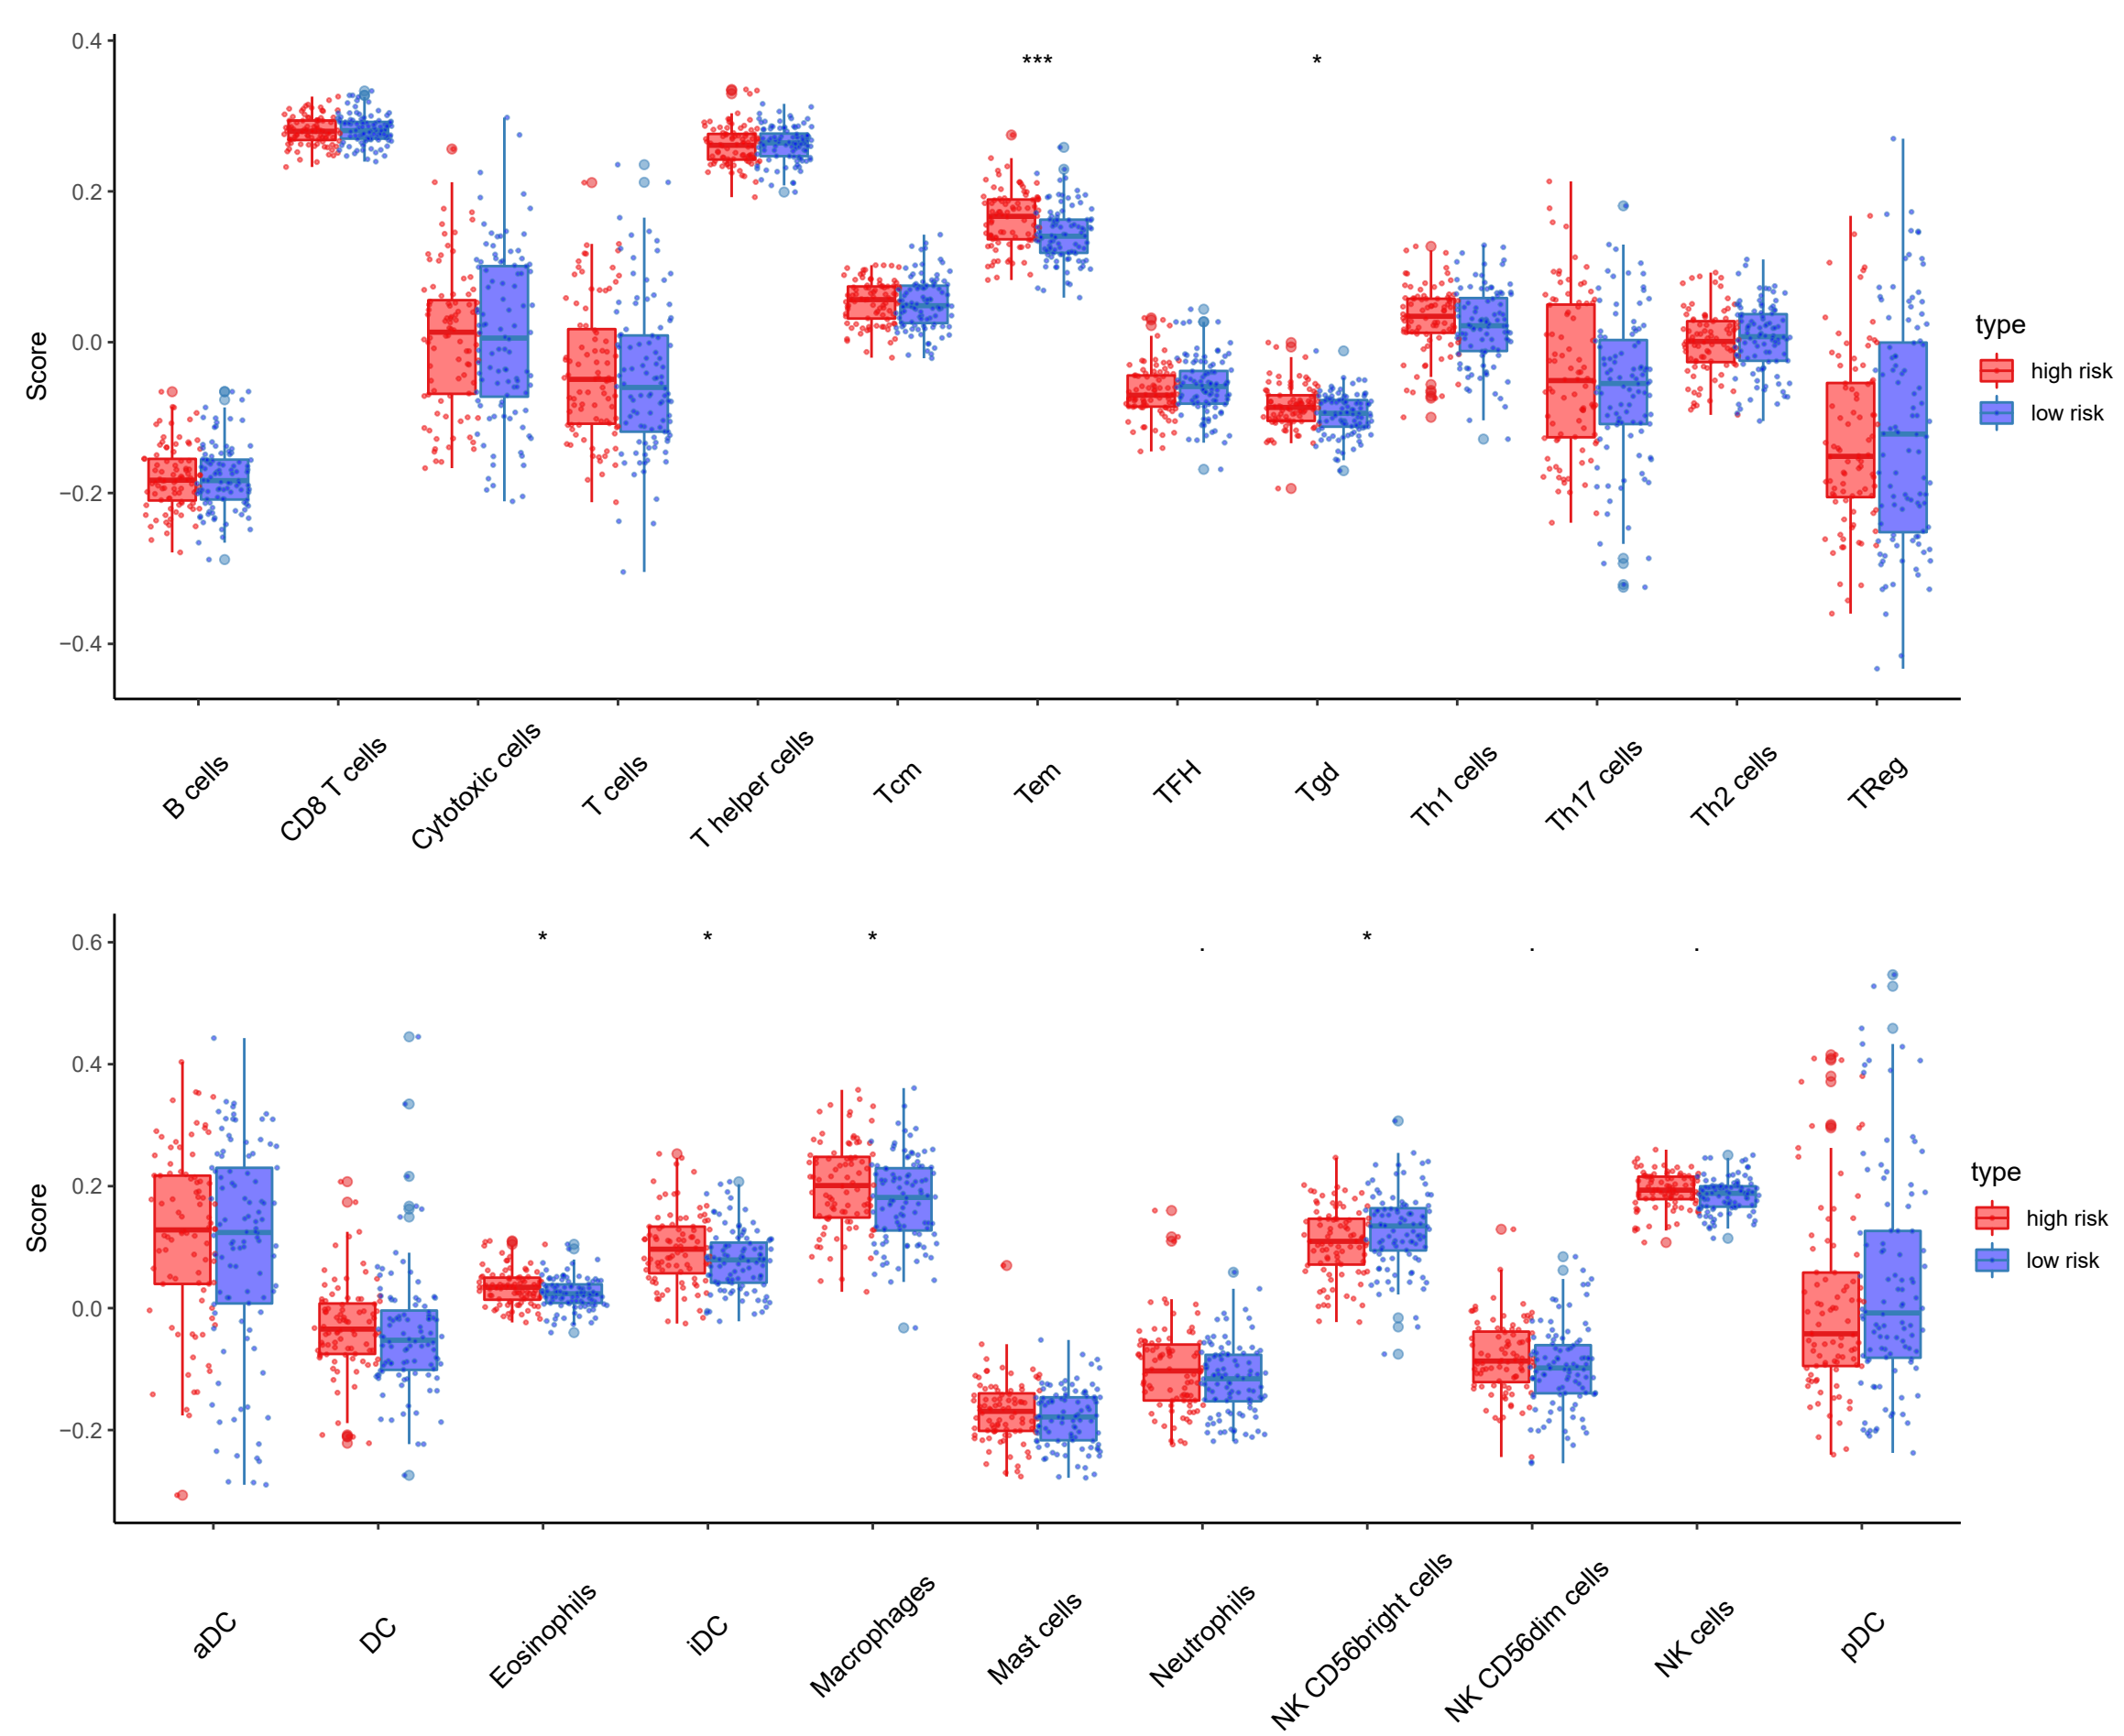

Supplement: f1 [file 6687391.f1.zip]
